# Supplementary material for: Highly efficient simulated solar-light photocatalytic oxidation of gaseous NO with porous carbon nitride from copolymerization with thymine and mechanistic analysis
Source: Royal Society of Chemistry journal article supplement (doi:10.1039/c6ra23251e), 2016-01-01
Supplement: c6ra23251e1.pdf [file c6ra23251e1.pdf]

## Supplementary Material

**Fig. S1** SEM images and TEM images of as-synthesized bulk CN.

**Fig. S2** Variations of NO conversion efficiency with irradiation time for control experiments with the absence of the CM+2.5mol%-T, visible-light irradiation, the H<sub>2</sub>O<sub>2</sub> solution, both CM+2.5mol%-T and the H<sub>2</sub>O<sub>2</sub> solution, respectively.

**Fig. S3** The fitting line obtained by standard solutions by using Ion Chromatography.

**Table S1** Results of nitrogen balance calculation from NO for the PCO with bulk CN and CM, CM+2.5mol%-T, CM+5mol%-T, CM+10mol%-T .

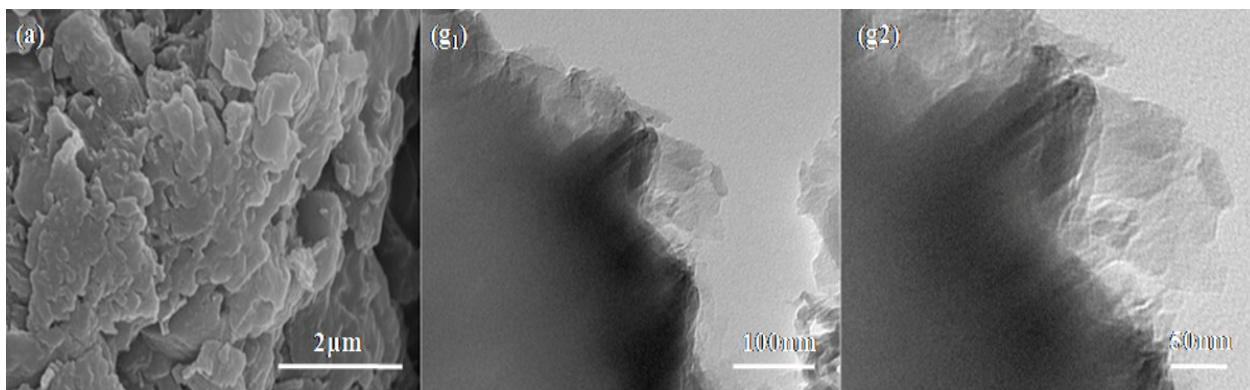

**Fig. S1** SEM and TEM images of as-synthesized bulk CN.

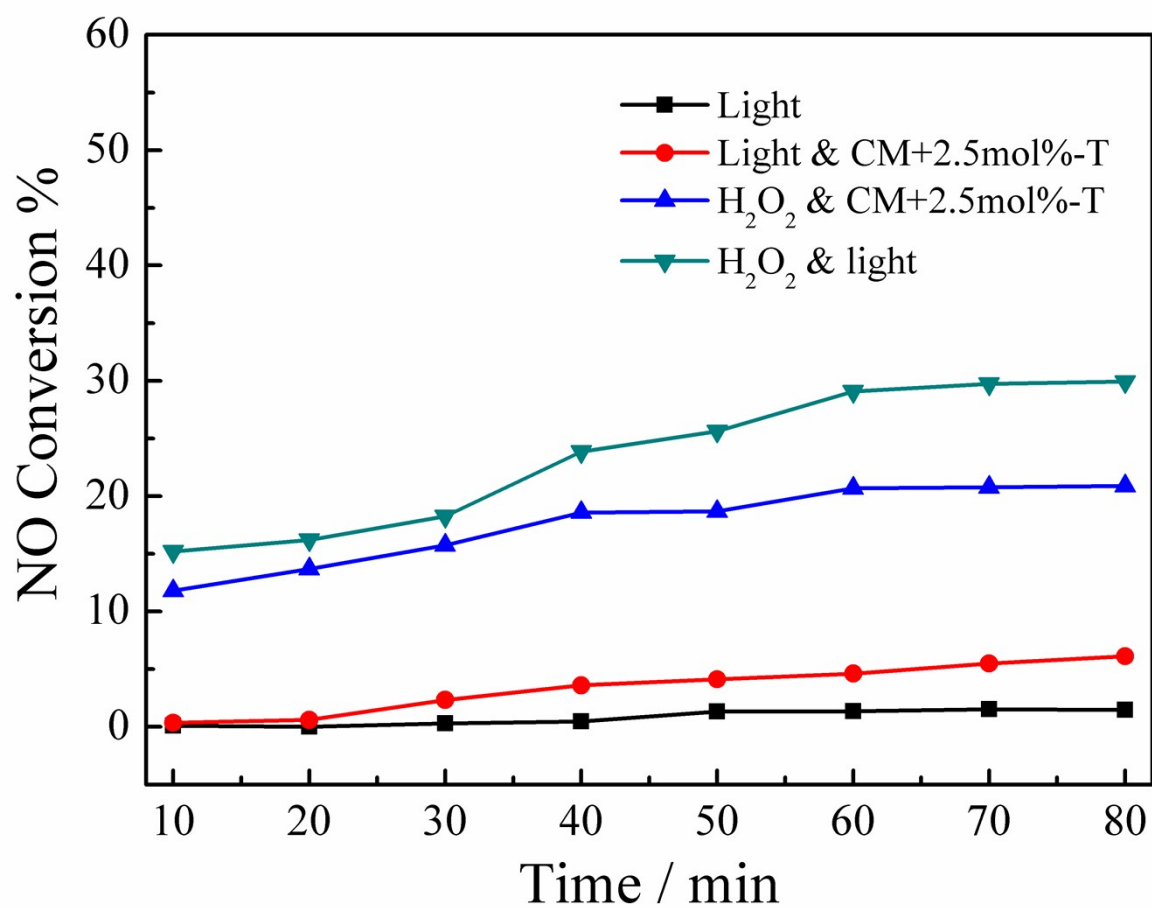

**Fig. S2** Variations of NO conversion efficiency with irradiation time for control experiments with the absence of the CM+2.5mol%-T, visible-light irradiation, the H<sub>2</sub>O<sub>2</sub> solution, both CM+2.5mol%-T and the H<sub>2</sub>O<sub>2</sub> solution, respectively.

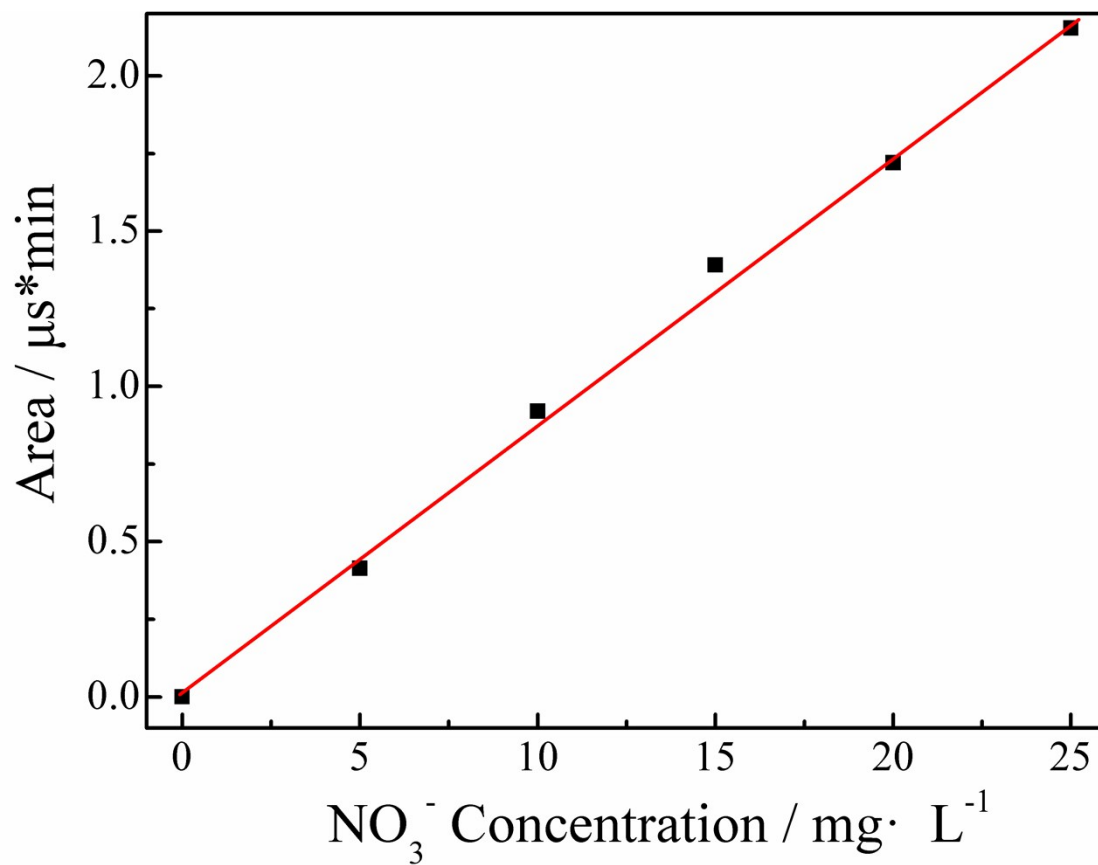

**Fig. S3** The fitting line obtained by standard solutions using Ion Chromatography.

**Table S1** Results of nitrogen balance calculation from NO for the PCO with bulk CN and CM, CM+2.5mol%-T, CM+5mol%-T, CM+10mol%-T ..

| Category                                            | M     | CM    | CM+2.5mol%-T | CM+5mol%-T | CM+10mol%-T |
|-----------------------------------------------------|-------|-------|--------------|------------|-------------|
| Time $t$ , min                                      | 80    | 80    | 80           | 80         | 80          |
| Gas flow $Q$ , mL·min <sup>-1</sup>                 | 100   | 100   | 100          | 100        | 100         |
| Solution volume $V_L$ , mL                          | 8     | 8     | 8            | 8          | 8           |
| $c_{NO,in}$ , ppm                                   | 366   | 382.2 | 383.7        | 382.7      | 379.4       |
| $c_{NO,out}$ , ppm                                  | 163.6 | 67.6  | 25.7         | 51.7       | 63.7        |
| NO conversion, %                                    | 55.3  | 82.3  | 93.3         | 86.5       | 83.2        |
| $c(\text{NO}_3^-)$ actual value, mg·L <sup>-1</sup> | 478.7 | 754.9 | 871.3        | 773.9      | 760.3       |
| $n(\text{NO}_3^-)$ actual value, mmol               | 0.062 | 0.097 | 0.112        | 0.100      | 0.098       |
| $n(\text{NO}_x^-)$ estimated value, mmol            | 0.066 | 0.103 | 0.117        | 0.108      | 0.103       |
| $n(\text{NO}_x^-)$ relative error, %                | 6.1   | 5.8   | 4.3          | 7.4        | 4.9         |
| Average $n(\text{NO}_x^-)$ relative error, %        |       |       | 5.7          |            |             |

to investigate possible byproducts, the nitrogen balancing calculation is performed. The actual molar value of  $\text{NO}_3^-$  and the estimated molar value of NO could be calculated by Eq. (1) and Eq. (2) based on the material balance of N element from NO:

$$n(\text{NO}_3^-)_{act} = \frac{C(\text{NO}_3^-) V_L}{M_{\text{NO}_3}} \quad (1)$$

$$n(\text{NO}_x^-)_{est} = \frac{C_{in} \eta Q t}{22.4} \times \frac{T_0}{T} \quad (2)$$

where  $n(\text{NO}_3^-)_{act}$  is the actual molar value of  $\text{NO}_3^-$  and  $n(\text{NO}_x^-)_{est}$  is the estimated molar value of NO;  $c(\text{NO}_3^-)$  is the actual concentration of  $\text{NO}_3^-$  in the solution;  $V_L$  represents the volume of solution;  $M_{\text{NO}_3}$  is the molar mass of  $\text{NO}_3^-$ ;  $C_{in}$  and  $\eta$  refer to inlet concentration of NO and conversion rate of NO, respectively;  $Q$  is the gas flow;  $t$  is the reaction time;  $T_0$  is zero centigrade (273 K), while  $T$  is environmental temperature (298 K). From the computing result above, it can be seen that the estimated value and actual value of N element are in an order of magnitude. Also, the relative error between them is small. Therefore, the N element of NO which participated in the reaction was almost transferred into that of produced  $\text{NO}_3^-$ .
